# Supplementary material
Source: PubMed Central journal article supplement (PMC10916502)
Supplement: NIHMS1943311-supplement-1.pdf [file NIHMS1943311-supplement-1.pdf]

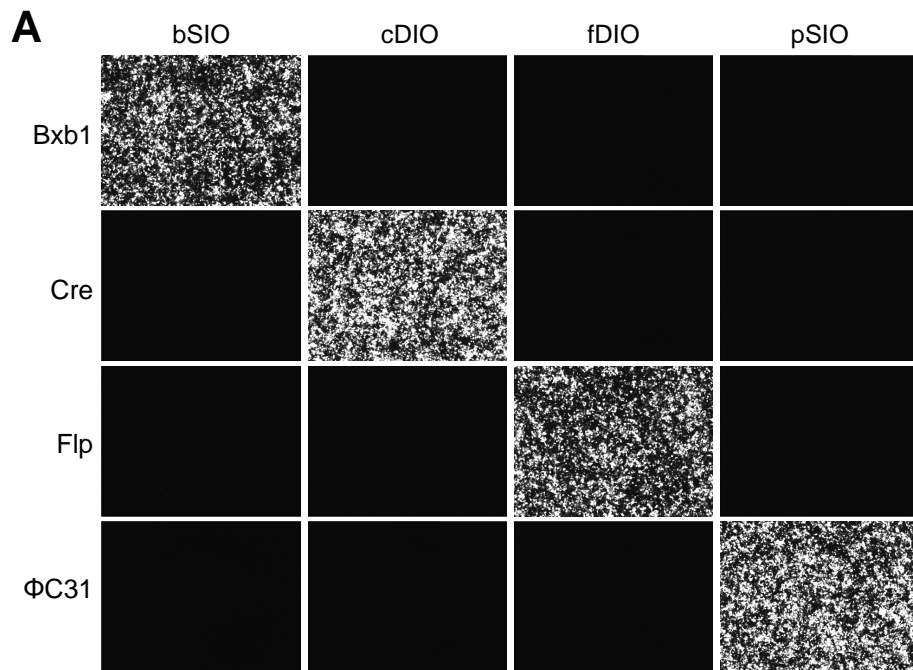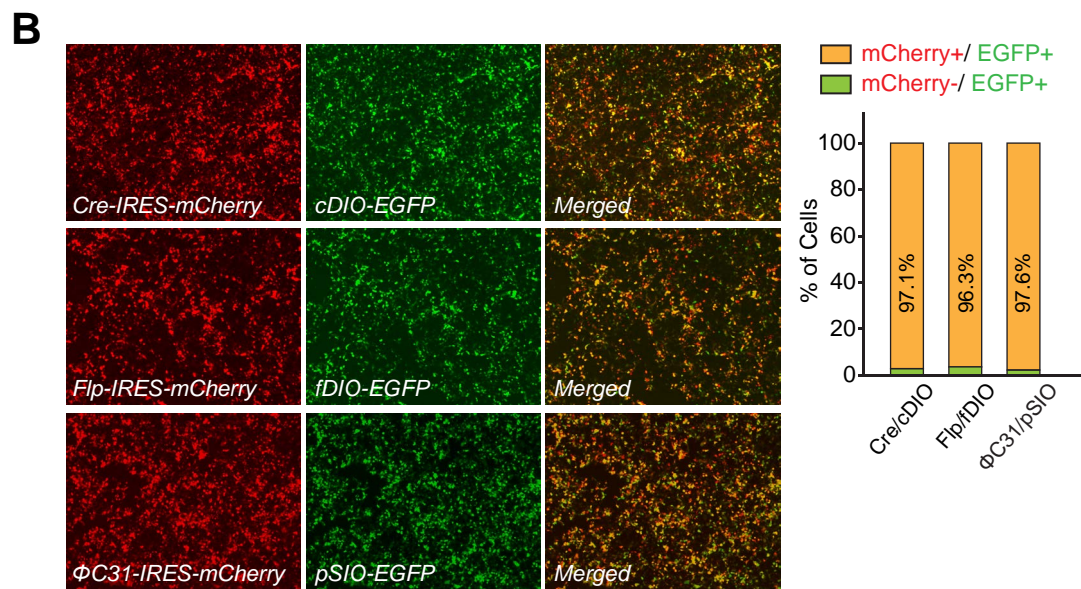

Supplementary Figure. 1

**Supplementary Fig. 1. The efficiency and cross-reactivity for the Cre, Flp,  $\Phi$ C31, and Bxb1 recombinase systems in HEK293T cells, related to Figure 1D.**

**A**, Specificity and efficiency of transgenes expression by bSIO, cDIO, fDIO, and pSIO vectors. Either one of the transgenes (mScarlet-I) expressing plasmids and either one of the recombinases expressing plasmid were co-transfected in HEK293T cells. **B**, By co-transfecting a plasmid encoding recombinase and mCherry (Cre-IRES-mCherry, Flp-IRES-mCherry, or  $\Phi$ C31-IRES-mCherry) along with a plasmid producing EGFP in a recombinase-dependent manner (cDIO-EGFP, fDIO-EGFP, or pSIO-EGFP), we were able to examine the specificity and effectiveness for each particular recombinase-reporter pair. The most of cells that express EGFP also express mCherry for all Cre-, Flp-, and  $\Phi$ C31 pair, indicating that the  $\Phi$ C31-pSIO system exhibits specific recombinase-dependent expression similar to that of Cre and Flp recombinase.

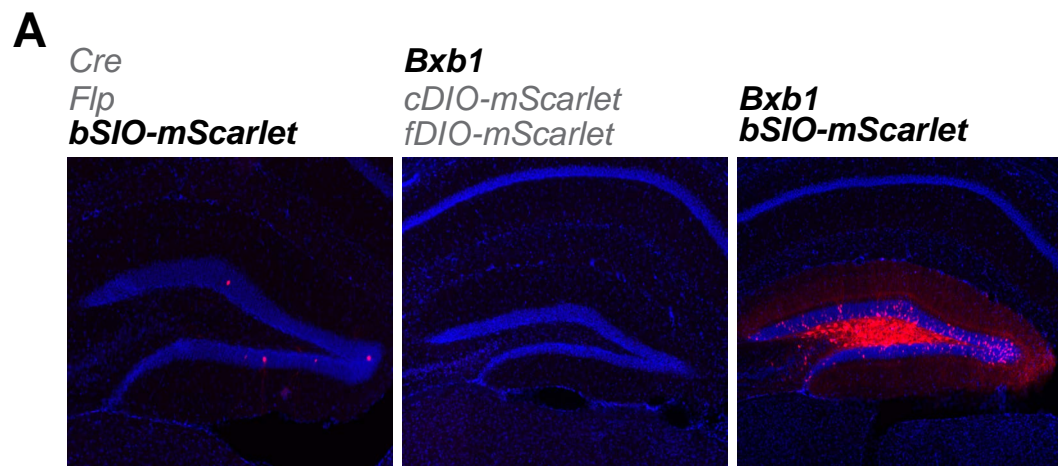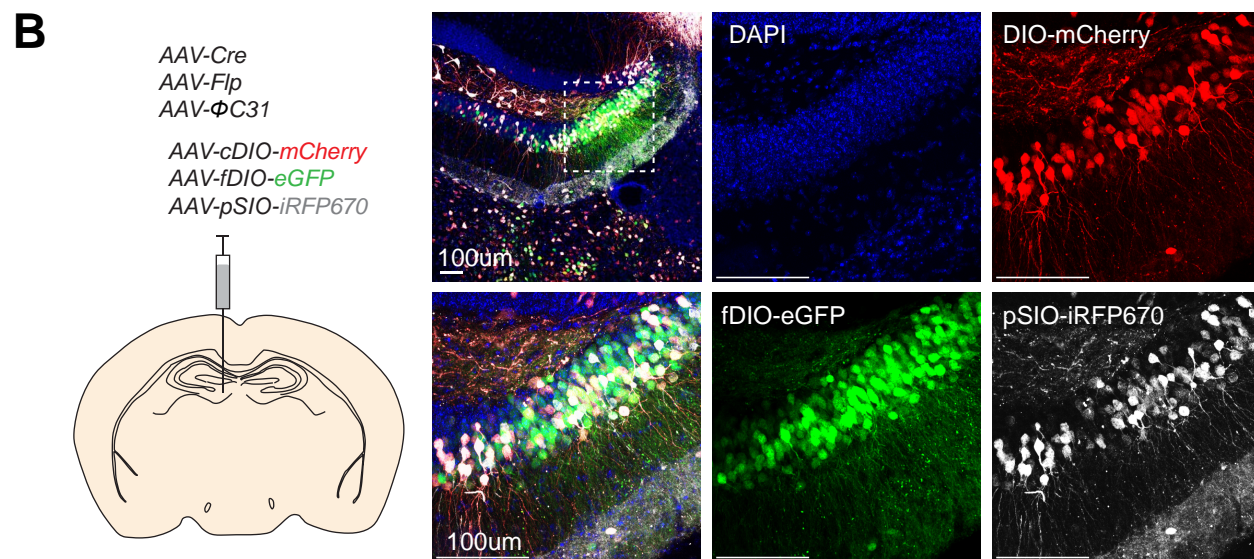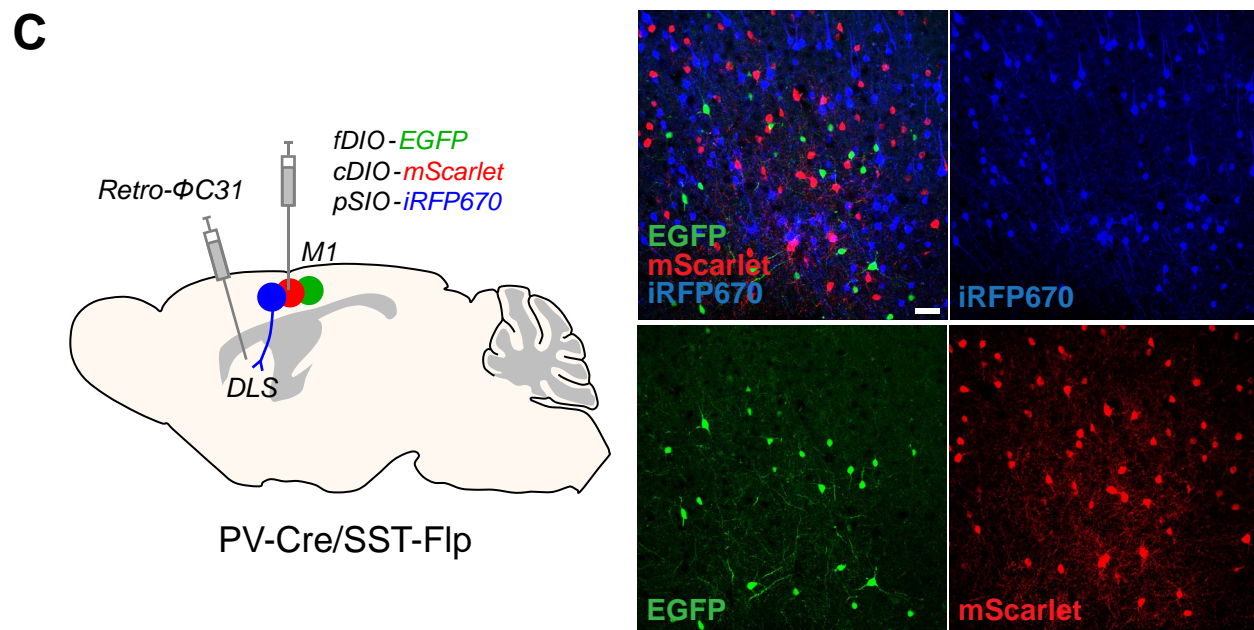

Supplementary Figure. 2

**Supplementary Fig. 2. The efficiency and cross-reactivity for the Cre, Flp, ΦC31, and Bxb1 recombinase systems *in vivo*, related to Figure 1E-G.**

**A**, Specificity and efficiency of transgenes expression by Bxb1/bSIO system *in vivo*. Combinations of AAVs as indicated were co-injected in the DG. Leaky expression from AAV-bSIO-mScarlet-I alone was observed. **B**, The injection of Cre-cDIO, Flp-fDIO, ΦC31-pSIO pairs into hippocampal areas. A similar amount of viral particle for each pair was injected. The result shows that a similar number of neurons are labeled with different colors, suggesting that recombinase combinations do not have significant competing or interfering effects when used together *in vivo*. **C**, Usage of cDIO, fDIO, and pSIO in order to express three different transgenes in three different populations defined by promoter activities or anatomical connectivity. AAV-EF1α-fDIO-EGFP, AAV-EF1α-cDIO-mScarlet-I, and AAV-EF1α-pSIO-iRFP670 were co-injected into M1, and retroAAV-ΦC31 were injected into DLS of PV-Cre/SST-Flp transgenic mice.

**A**

$\Phi$ C31 ..... ACCACAAGCACCTGCCT .....  
 T H K H L P  
 227 228

$\Phi$ C31(reverseF3) ..... ACCACAAGGGCGGCTCCGGAGGCAGCGGGAAGTTCCTATACTATTTGAAGAATAGGAAC TTCGAAGGAGGATCCGGTGGAAGCCACCTGCCT .....  
 T H K G G S G G S G K F L Y Y L K N R N F E G G S G G S H L P  
 227 228

**B**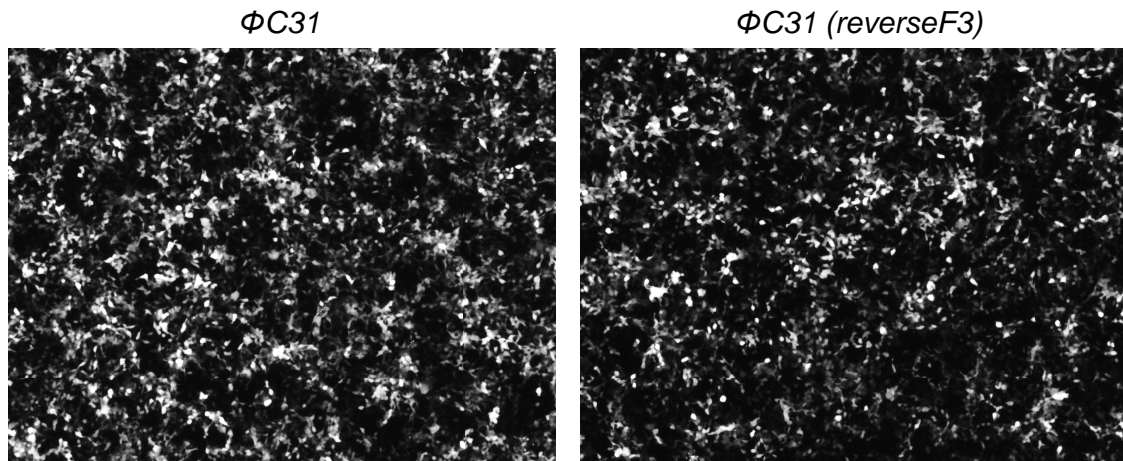**C**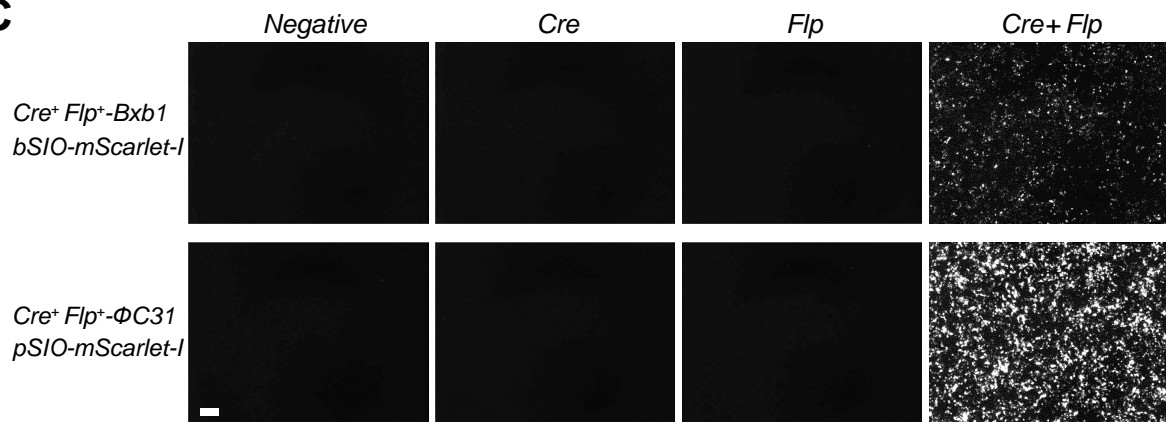**D**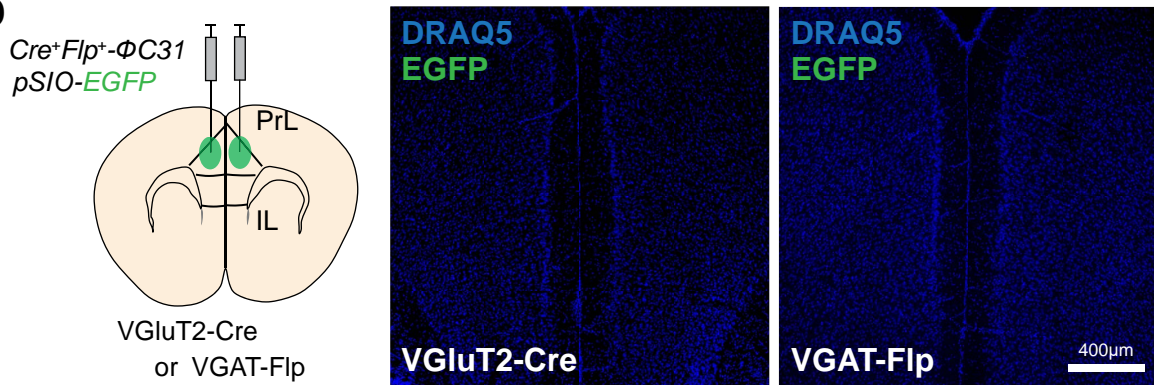

Supplementary Figure. 3

**Supplementary Fig. 3. The efficiency and specificity of  $\Phi$ C31-dependent intersectional expression in cells expressing both Cre and Flp recombinase, related to Figure 5.**

**A,** Insertion site of the FRT variant (F3) in the  $\Phi$ C31. The numbers indicate the residues in intact  $\Phi$ C31.

**B,** Comparison of the efficiency of the intact  $\Phi$ C31 and  $\Phi$ C31 with FRT variant insertion. Either one of the recombinases expressing vector were co-transfected in HEK293T cells together with pSIO-Scarlett-I plasmid.

**C,** Specificity and efficiency of Cre<sup>+</sup>Flp<sup>+</sup>- $\Phi$ C31 and Cre<sup>+</sup>Flp<sup>+</sup>-Bxb1 in HEK293T cells. Upper panels: Cre<sup>+</sup>Flp<sup>+</sup>-Bxb1, bSIO-mScarlet-I, and Cre and/or Flp expressing plasmids were cotransfected. Lower panels: Cre<sup>+</sup>Flp<sup>+</sup>- $\Phi$ C31, pSIO-mScarlet-I, and Cre and/or Flp expressing plasmids were co-transfected. **D.** The injection of Cre<sup>+</sup>Flp<sup>+</sup>- $\Phi$ C31, pSIO-EGFP into the prelimbic cortex (PrL) of VGluT1-Cre or VGAT-Flp (left). Four weeks after the injection, we did not observe any EGFP-positive neurons in the injected area, suggesting very low level of leaky expression with Cre<sup>+</sup>Flp<sup>+</sup>- $\Phi$ C31 and pSIO combination.

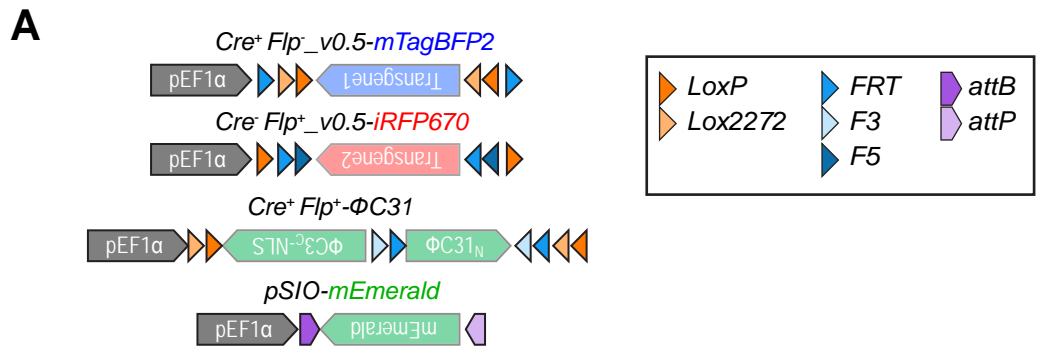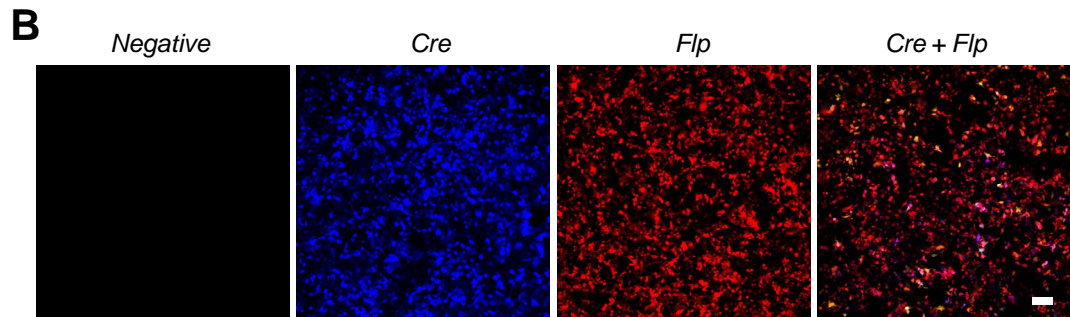

**C**

|                | Palindromic armL | Spacer   | Palindromic armR |
|----------------|------------------|----------|------------------|
| <b>Cre</b>     | →                | ←        | ←                |
| <b>LoxP</b>    | ATAACTTCGTATA    | GCATACAT | TATACGAAGTTAT    |
| <b>Lox2272</b> | ATAACTTCGTATA    | GGATACTT | TATACGAAGTTAT    |
| <b>M3</b>      | ATAACTTCGTATA    | TAATACCA | TATACGAAGTTAT    |
| <b>M7</b>      | ATAACTTCGTATA    | AGATAGAA | TATACGAAGTTAT    |
| <b>FAS</b>     | ATAACTTCGTATA    | TACCTTTC | TATACGAAGTTAT    |
| <b>Flp</b>     | →                | ←        | ←                |
| <b>FRT</b>     | GAAGTTCCTATTC    | TCTAGAAA | GTATAGGAACTTC    |
| <b>F5</b>      | GAAGTTCCTATTC    | TTCAAAG  | GTATAGGAACTTC    |
| <b>F2</b>      | GAAGTTCCTATTC    | TCTACTTA | GTATAGGAACTTC    |
| <b>F3</b>      | GAAGTTCCTATTC    | TTCAAATA | GTATAGGAACTTC    |
| <b>F10</b>     | GAAGTTCCTATTC    | ACTAGAAT | GTATAGGAACTTC    |
| <b>F15</b>     | GAAGTTCCTATTC    | TTATAGGA | GTATAGGAACTTC    |

Supplementary Figure. 4

**Supplementary Fig. 4. Schematic diagram of the composition of Cre<sup>+</sup>/Flp<sup>+</sup>, Cre<sup>+</sup>/Flp<sup>-</sup>, and Cre<sup>-</sup>/Flp<sup>+</sup> vectors, related to Figure 6.**

**A**, Design of Cre<sup>+</sup>Flp<sup>-</sup>, Cre<sup>-</sup>Flp<sup>+</sup>, and Cre<sup>+</sup>Flp<sup>+</sup> vectors with overlapping target sites among the vectors. **B**, Expression of three transgenes in cells expressing a different combination of recombinases. Cre<sup>+</sup>Flp<sup>-</sup>\_v0.5-mTagBFP, Cre<sup>-</sup>Flp<sup>+</sup>\_v0.5-iRFP670, Cre<sup>+</sup>Flp<sup>+</sup>-ΦC31, pSIO-mEmerald, and Cre and/or Flp-expressing plasmids were co-transfected in HEK293T cells. The iRFP670 signal is pseudocolored in red. Scale bar = 50 μm. **C**, The sequence information for the different recognition sites for Cre- and Flp recombinases used in this work.
